# Supplementary material
Source: MDPI journal article supplement (https://www.mdpi.com/2076-3298/11/2/25)
Supplement: s1 [file s1 › environments-2714792-supplementary material.pdf]

## Supplementary Material

# Recycling, Material Flow, and Recycled Content Demands of Polyethylene Terephthalate (PET) Bottles towards a Circular Economy in Korea

Chonghee Lee, Yong-Chul Jang \*, Kyunghoon Choi, Byeonghwan Kim, Hakyun Song and Youngsun Kwon

Department of Environmental Engineering, Chungnam National University, Daejeon 34134, Republic of Korea;  
cheelee0214@gmail.com (C.L.); choikhoon@gmail.com (K.C.); bhkim0104@gmail.com (B.K.);  
hakyunsong1126@gmail.com (H.S.); deu04320@gmail.com (Y.K.)

\* Correspondence: gogator@cnu.ac.kr; Tel.: +82-42-821-6674

Prediction of the consumption amounts of PET bottles until 2040, was made referring to the following five mathematical models: Linear model, Arithmetic series, Least square method, Logistic model, and Gompertz model. Detailed information including equations of each model is shown in Table S1.

**Table S1.** Five mathematical models and related equations

| Mathematical model  | Content                                                                                                                         | Equation                                                                                                                                                                                                                                                 |
|---------------------|---------------------------------------------------------------------------------------------------------------------------------|----------------------------------------------------------------------------------------------------------------------------------------------------------------------------------------------------------------------------------------------------------|
| Linear model        | Predicts continuous audiences based on a linear relation relationship between the audience and one or more predictors           | $y = ax + b$ <p>y: Estimated waste generation<br/>x: Number of years from base year to forecast year<br/>a, b: Constant</p>                                                                                                                              |
| Arithmetic series   | Relatively easy and straightforward to estimate waste generation; suitable for cities with stable waste generation growth rates | $P_n = P_0(1 + rn)$ $r = \frac{1}{n}(\frac{P_n}{P_0} - 1)$ <p><math>P_n</math>: Waste generation in year n<br/><math>P_0</math>: Waste generation in the base year<br/>r: Average growth rate<br/>n: Number of years from base year to forecast year</p> |
| Least square method | Suitable for cities with large fluctuations in waste generation; applicable to most cities                                      | $y = a + bx$ $a = \frac{\sum y}{n} - b \frac{\sum x}{n}$                                                                                                                                                                                                 |

|                |                                                                                                                                                                                                                                                                                                                                                                                     |                                                                                                                                                                                                              |
|----------------|-------------------------------------------------------------------------------------------------------------------------------------------------------------------------------------------------------------------------------------------------------------------------------------------------------------------------------------------------------------------------------------|--------------------------------------------------------------------------------------------------------------------------------------------------------------------------------------------------------------|
|                |                                                                                                                                                                                                                                                                                                                                                                                     | $b = \frac{n \sum xy - \sum x \sum y}{x \sum x^2 - (\sum x)^2}$ <p>y: Estimated waste generation<br/> x: Number of years from base year to forecast year<br/> a, b: Constant<br/> n: Number of materials</p> |
| Logistic model | Initially, the growth of waste generation is slow, then it increases rapidly after a period of time, and then the growth rate decreases to maintain a constant number (converges to a threshold); used when you want to tightly control the amount of waste generation in a metropolitan area up to some upper limit; can provide relatively accurate estimates of waste generation | $y = \frac{K}{1 + e^{a+bx}}$ <p>K: Carrying capacity<br/> a, b: Constant (b&lt;0)<br/> x: Number of years from base year to forecast year</p>                                                                |
| Gompertz model | A type of mathematical model that represents a growth cycle as an S-curve; one of the growth curve methods of time series analysis                                                                                                                                                                                                                                                  | $y_t = Ka^{b^t}$ <p>K: Carrying capacity<br/> a, b: Constant<br/> t: Time variables<br/> <math>y_t</math>: Cumulative waste generation over t period</p>                                                     |
